# Supplementary material
Source: publisher figshare collection journal article supplement (https://acs.figshare.com/ndownloader/files/4442662)
Supplement: Supplementary file 1 [file 4442662]

## Supporting Information

# Photopolymerization and Formation of a Stable Purple Langmuir Blodgett film Based on the Gemini-type Amphiphilic Diacetylene Derivatives

*Ling Zhong, Xuefeng Zhu, Pengfei Duan and Minghua Liu\**

Beijing National Laboratory for Molecular Sciences (BNLMS), Key Laboratory of Colloid and Interface Science, Institute of Chemistry, The Chinese Academy of Sciences, Beijing 100190, PR China.

Tel: +86-10-82615803. Fax: +86-10-62569564.

E-mail: [liumh@iccas.ac.cn](mailto:liumh@iccas.ac.cn)

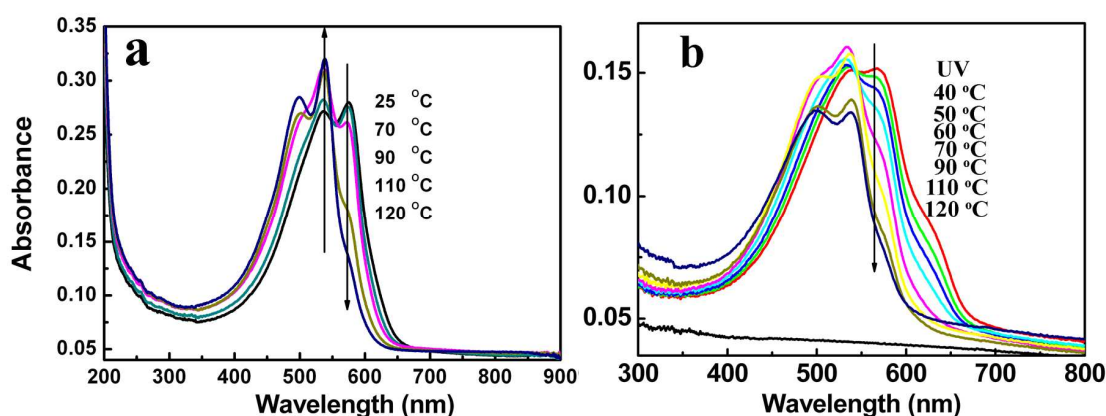

Figure S1 UV-vis spectra of TCDA-LysEs (a) TCDA-LysAc (b) LB film upon heating to different temperatures.

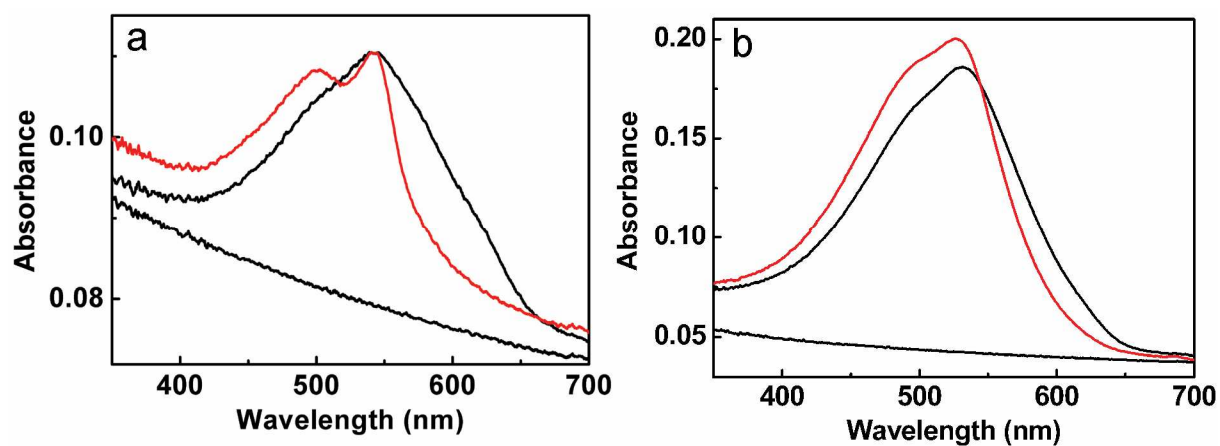

Figure S2 UV-vis spectra of TCDA-LysEs and TCDA-LysAc cast films before (bottom black line) and after (black line) UV irradiation and subsequent heating treatment (red line).
